# Supplementary material for: Zn-doped NiMoO4 enhances the performance of electrode materials in aqueous rechargeable NiZn batteries
Source: Royal Society of Chemistry journal article supplement (doi:10.1039/d4nr02822h), 2024-01-01
Supplement: d4nr02822h1.pdf [file d4nr02822h1.pdf]

## Electronic Supplementary Information

### **Zn-doped NiMoO<sub>4</sub> enhances rechargeable aqueous NiZn batteries**

Xingyan Zhang\* and Dag Noréus

*Inorganic and Structural Chemistry, Department of Materials and Environmental Chemistry,  
Stockholm University, SE 106 91 Stockholm, Sweden*

\*E-mail of the corresponding author: [xingyan.zhang@mmk.su.se](mailto:xingyan.zhang@mmk.su.se)

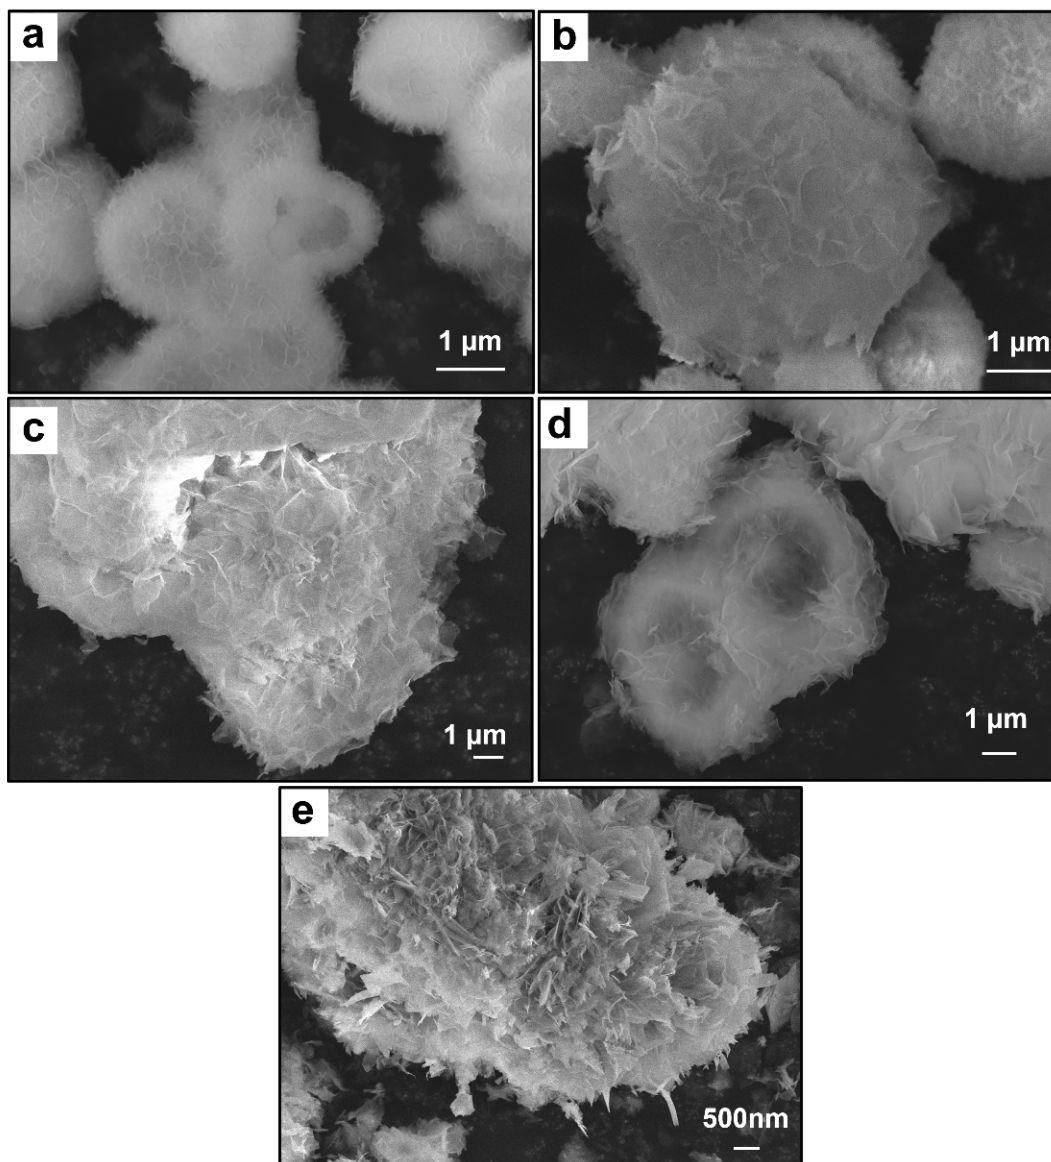

**Fig. S1** SEM images of obtained powder materials: (a)  $\text{NiMoO}_4$ , (b)  $\text{Ni}_{0.75}\text{Zn}_{0.25}\text{MoO}_4$ , (c)  $\text{Ni}_{0.5}\text{Zn}_{0.5}\text{MoO}_4$ , (d)  $\text{Ni}_{0.25}\text{Zn}_{0.75}\text{MoO}_4$ , and (e)  $\text{ZnMoO}_4$ , respectively.

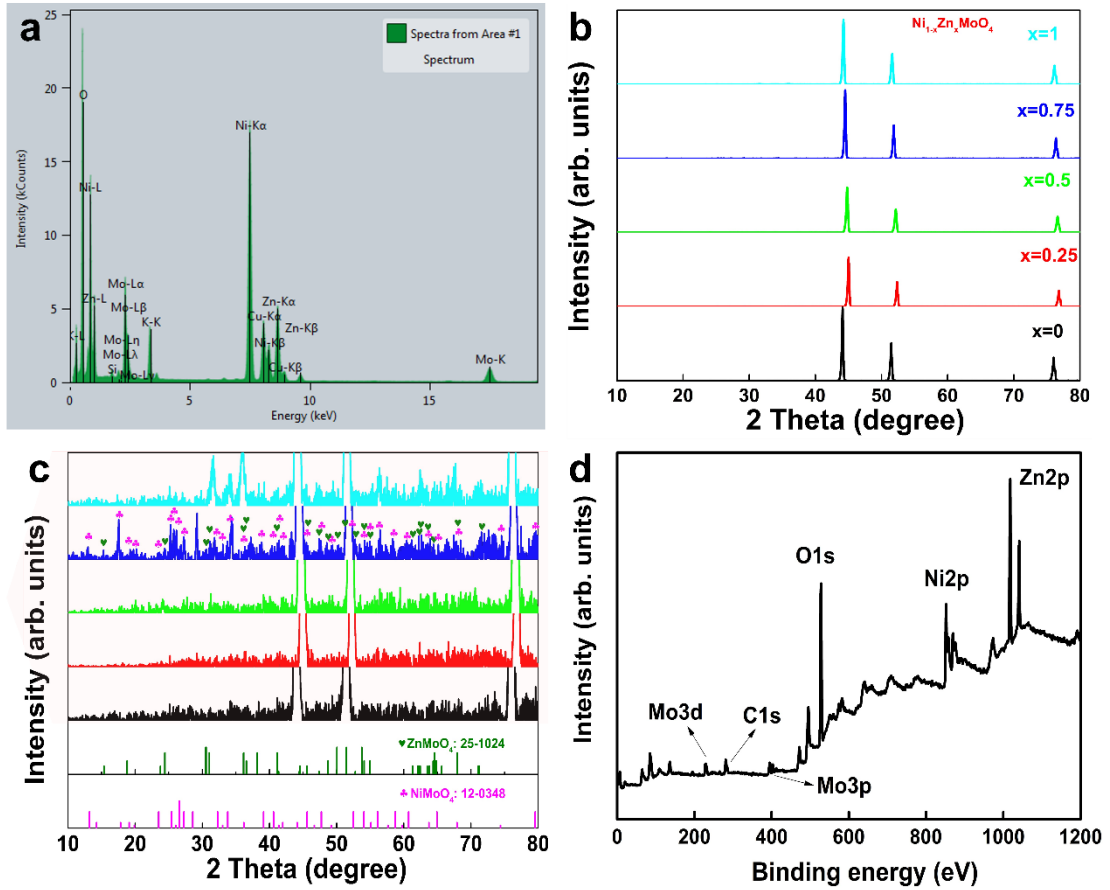

Fig. S2 (a) the corresponding element spectrum, (b) the XRD patterns of obtained bind-free materials, (c) the corresponding partial enlarged patterns, and (d) the XPS spectrum of  $\text{Ni}_{0.75}\text{Zn}_{0.25}\text{MoO}_4$ .

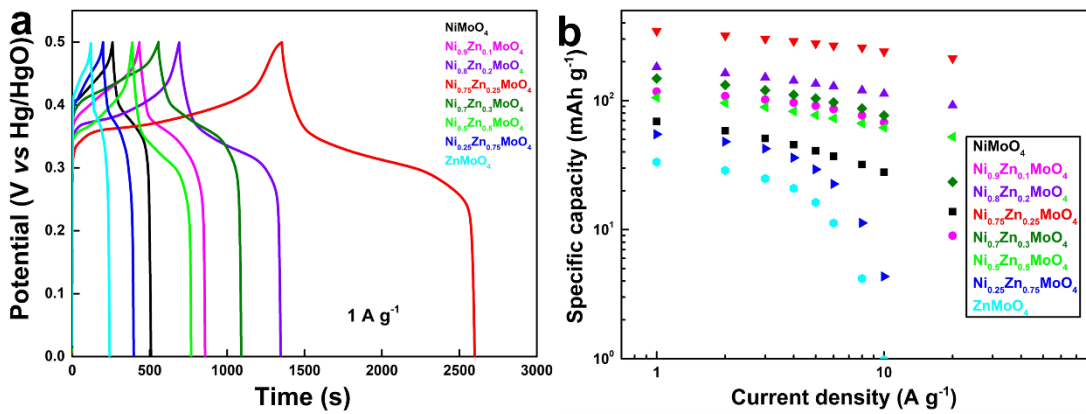

Fig. S3 Comparison of electrochemical performance of obtained materials in a three-electrode system (6 M KOH): (a) comparison GCD curves, and (b) specific capacitances at different current densities.

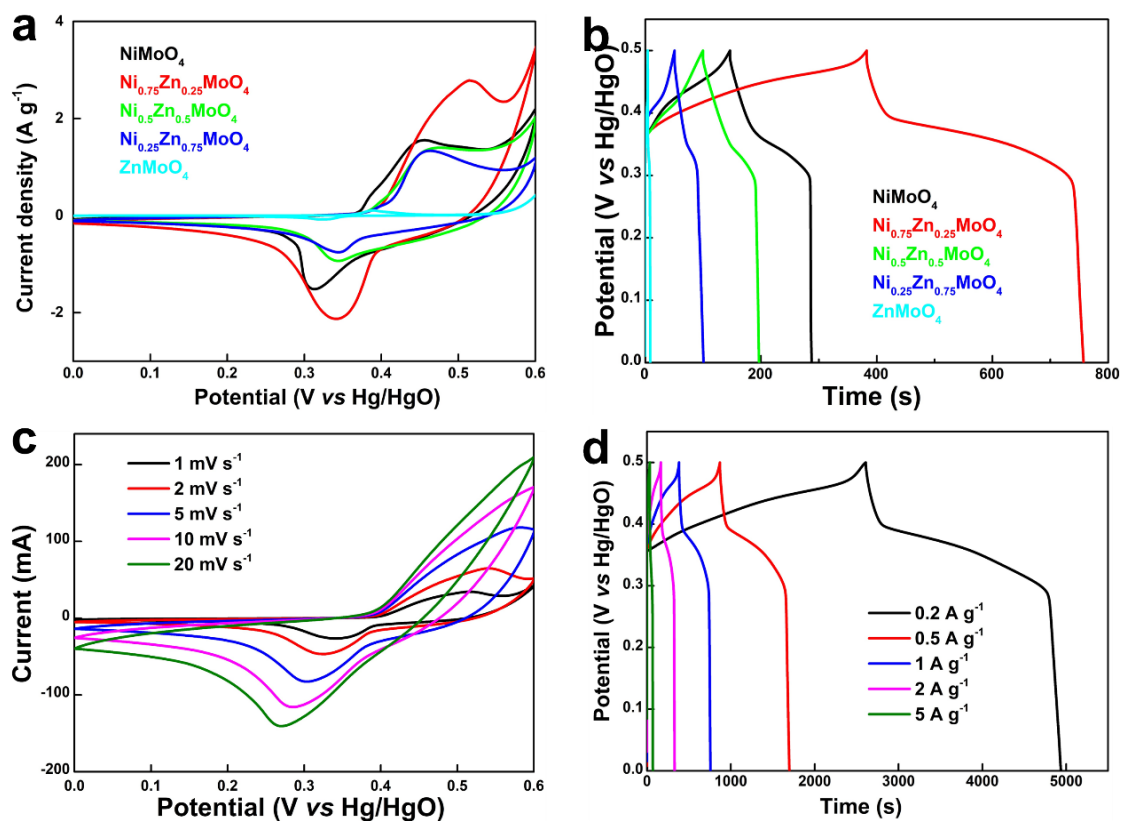

**Fig. S4** Electrochemical performance of obtained powder materials in a three-electrode system (6 M KOH): (a and b) comparison CV and GCD curves, respectively, (c and d) CV and GCD curves of Ni<sub>0.75</sub>Zn<sub>0.25</sub>MoO<sub>4</sub> powder.

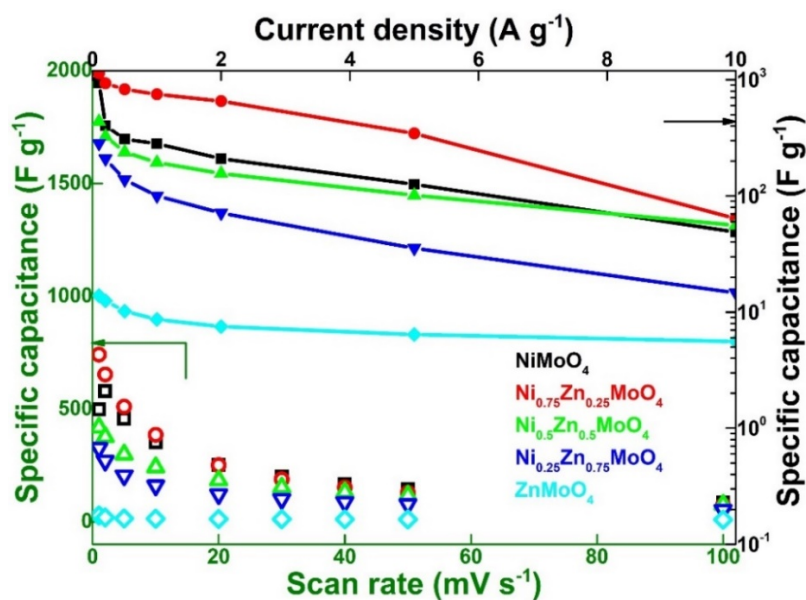

**Fig. S5** Specific capacitances of obtained powder materials at different scan rates and current densities.

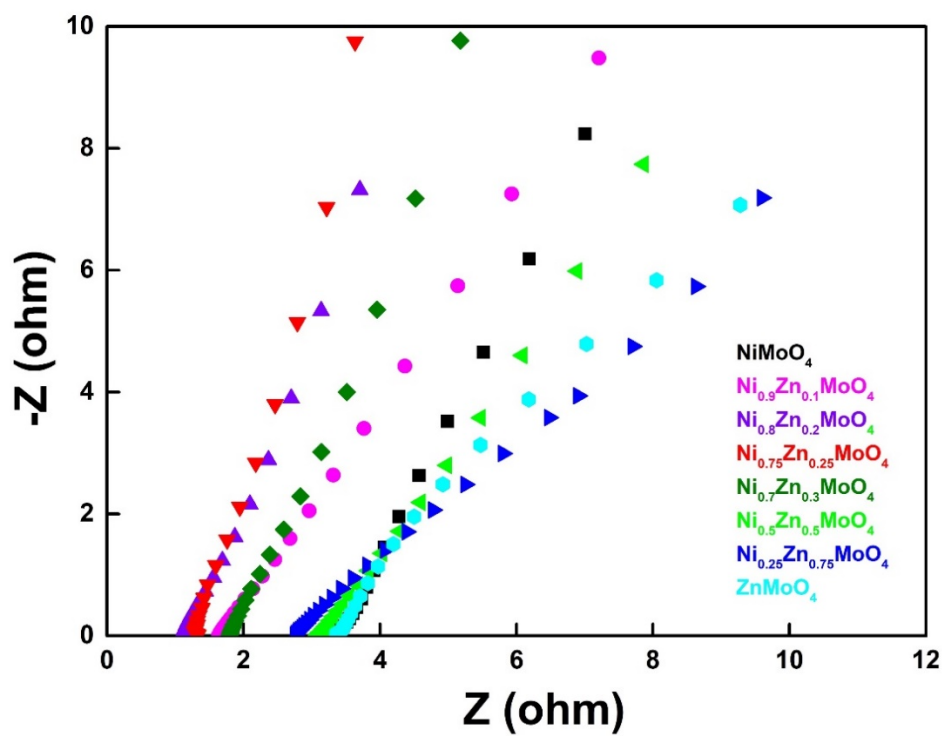

Fig. S6 Comparison of EIS plots of obtained materials in a three-electrode system (6 M KOH).

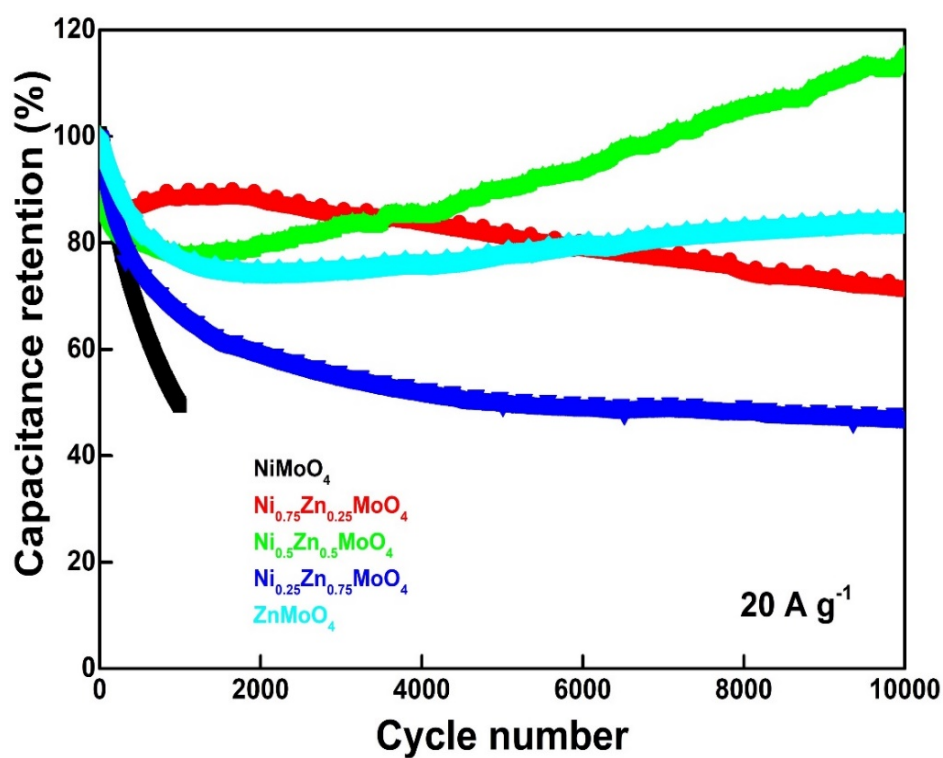

Fig. S7 Comparison of cycling stability of all the obtained powder materials at 20 A g<sup>-1</sup>.
